# Supplementary material for: Chemical redox-induced chiroptical switching of supramolecular assemblies of viologens
Source: Royal Society of Chemistry journal article supplement (doi:10.1039/d1ra08984f), 2022-01-01
Supplement: d1ra08984f1.pdf [file d1ra08984f1.pdf]

## Supporting Information

### Chemical redox-induced chiroptical switching of supramolecular assemblies of viologens

Yutaka Kuwahara,<sup>a,b\*</sup> Mio Ito,<sup>a</sup> Makoto Takafuji,<sup>a,b</sup> Hirotaka Ihara,<sup>a,c</sup> Naoya Ryu,<sup>d</sup> and Tomoyasu Mami<sup>e</sup>

<sup>a</sup> *Department of Applied Chemistry and Biochemistry, Kumamoto University, 2-39-1 Kurokami, Chuo-ku, Kumamoto 860-8555, Japan. E-mail: kuwahara@kumamoto-u.ac.jp*

<sup>b</sup> *International Research Organization for Advanced Science and Technology (IROAST), Kumamoto University, 2-39-1 Kurokami, Chuo-ku, Kumamoto 860-8555, Japan.*

<sup>c</sup> *National Institute of Technology, Okinawa College, 905 Henoko, Nago, Okinawa 905-2192, Japan.*

<sup>d</sup> *Materials Development Department, Kumamoto Industrial Research Institute 3-11-38 Higashimachi, Higashi-ku Kumamoto 862-0901, Japan.*

<sup>e</sup> *Department of Chemistry, University of Connecticut, 55 N. Eagleville Rd, Storrs, CT 06269-3060, United States.*

## NMR spectroscopy of L-glutamic acid derivatives, $\mathbf{G-V^{2+}}$ .

The  $^1\text{H}$  and  $^{13}\text{C}$  NMR spectra of  $\mathbf{G-V^{2+}}$  were measured in  $\text{DMSO-}d_6$  at  $25\text{ }^\circ\text{C}$  (Figure S3). The  $\mathbf{G-V^{2+}}$  was identified from a result of the high resolution  $^1\text{H}$ -NMR spectrum (Figure S3a). However, we only obtained a  $^{13}\text{C}$  NMR spectrum with low resolution in  $\text{DMSO-}d_6$ , as shown in Figure S3b, due to the low concentration of  $\mathbf{G-V^{2+}}$  ( $[\mathbf{G-V^{2+}}] = 1.1\text{ mM}$ ). A  $\text{D}_2\text{O}$  solution of higher concentration ( $3.8\text{ mM}$ ) of  $\mathbf{G-V^{2+}}$  was prepared because we were unable to prepare a DMSO solution with a concentration higher than  $1.1\text{ mM}$  owing to the poor solubility of the  $\mathbf{G-V^{2+}}$  for DMSO. For the  $^1\text{H}$  NMR spectra of the  $\text{D}_2\text{O}$  solution ( $[\mathbf{G-V^{2+}}] = 3.8\text{ mM}$ ) at  $25\text{ }^\circ\text{C}$ , peak-broadening and decrease in the number of peaks were observed due to aggregation of the  $\mathbf{G-V^{2+}}$  and hydrogen bond formation on the amide groups. For  $^{13}\text{C}$  NMR spectra, no peak was observed at  $25$  and  $70\text{ }^\circ\text{C}$  because aggregation and partial gelation of the  $\mathbf{G-V^{2+}}$  was occurred in the  $\text{D}_2\text{O}$  solution. Therefore,  $\mathbf{G-V^{2+}}$  could not be characterized by the  $^{13}\text{C}$  NMR spectra in this study.

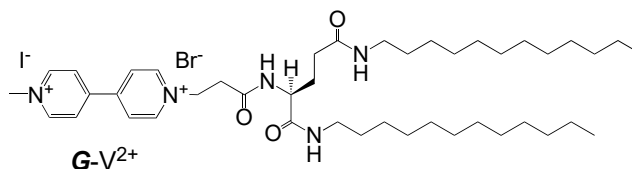

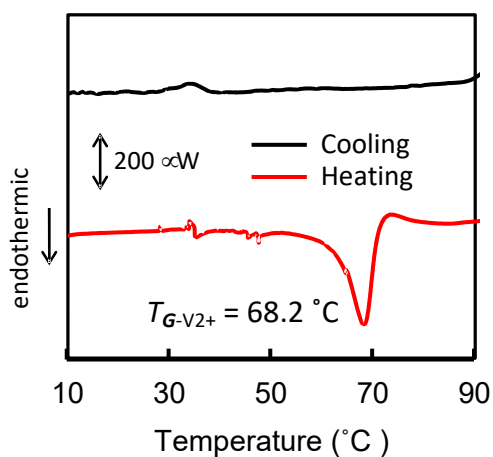

**Figure S1.** DSC thermograms of an aqueous solution of  $\mathbf{G-V}^{2+}$  (20 mM). The heating rate was 2 °C/ min.  $T_{\mathbf{G-V}^{2+}}$  is a phase-transition temperature of the aqueous  $\mathbf{G-V}^{2+}$  solution.

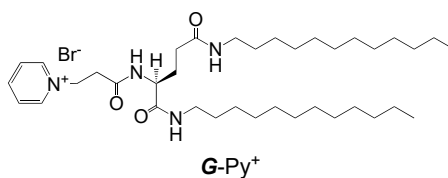

**Figure S2.** Structure of mono-pyridinium- (N-ethyl pyridinium-) substituted glutamide ( $\mathbf{G-Py}^+$ ).

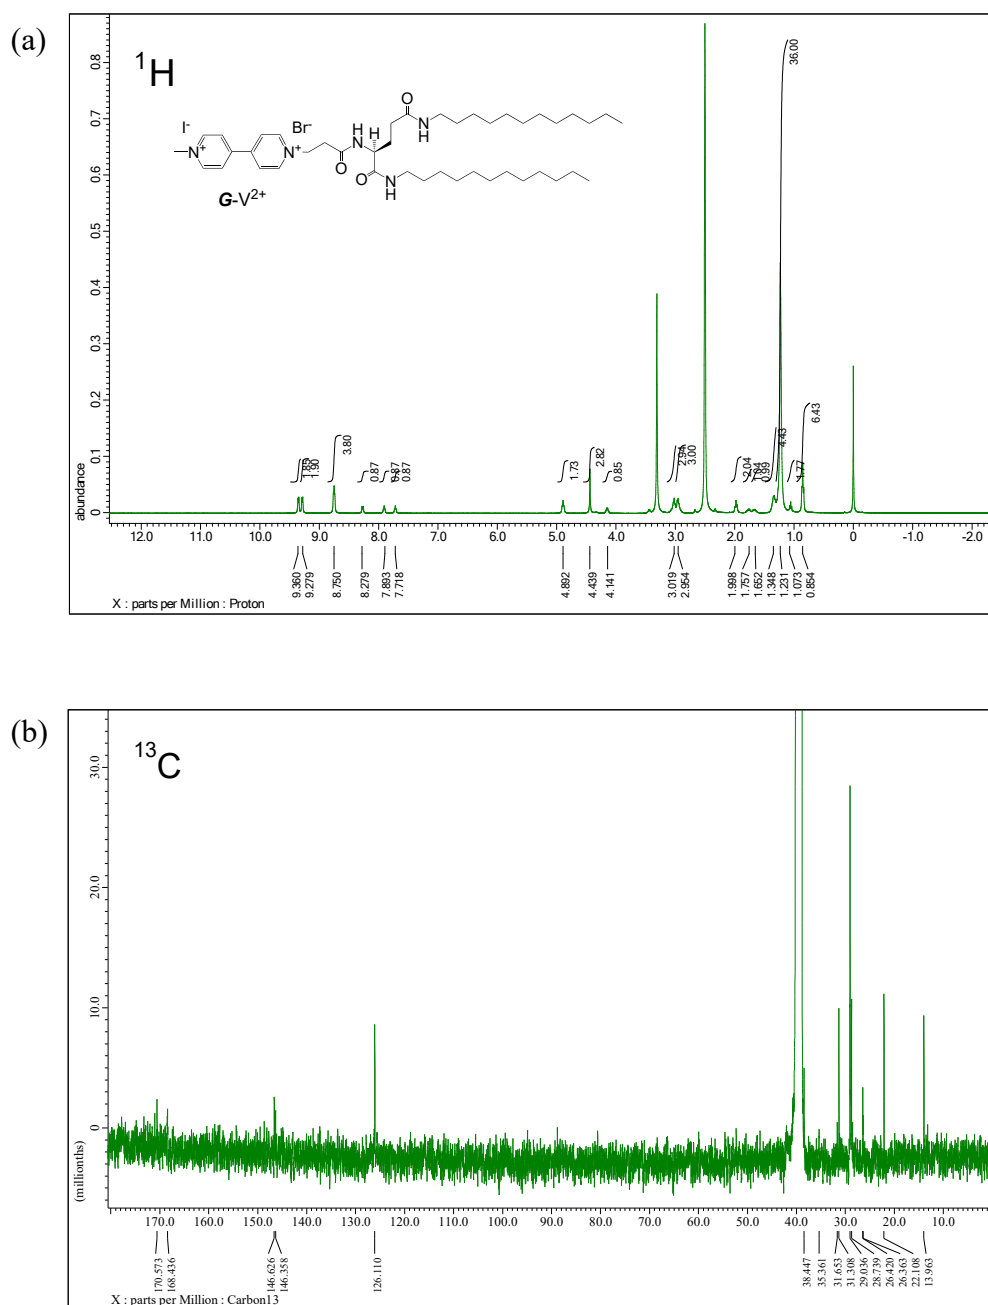

**Figure S3.** <sup>1</sup>H-NMR (a, 400 MHz) and <sup>13</sup>C-NMR (b, 100 MHz) spectra of **G-V<sup>2+</sup>** (DMSO-*d*<sub>6</sub>, TMS, 25 °C).

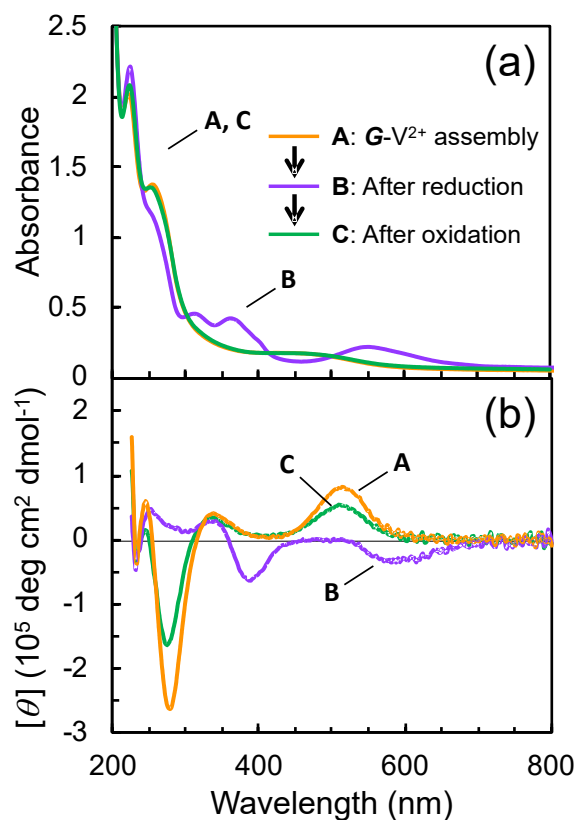

**Figure S4.** (a) UV-vis absorption and (b) CD spectra of an aqueous  $\mathbf{G-V^{2+}}$  solution (0.5 mM) before reduction (line A), after reduction via sodium dithionite (0.5 mM) under an Ar atmosphere (line B), and after subsequent oxidation via air exposure at 10 °C (line C). The cell path length was 1 mm.

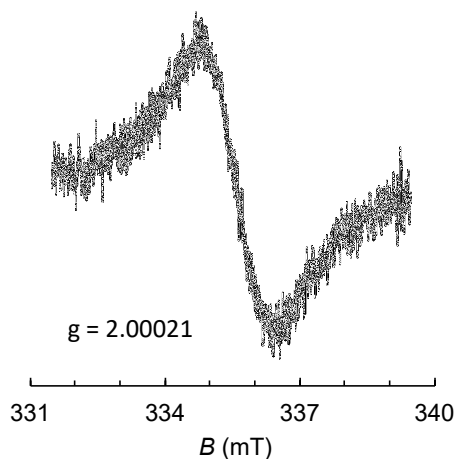

**Figure S5.** ESR spectrum of an aqueous  $\mathbf{G-V^{2+}}$  solution (0.5 mM) chemically reduced using sodium dithionite (0.6 mM) at 20 °C. Experimental parameters: modulation frequency = 100 kHz; modulation amplitude = 0.05 mT; sweep time = 900 s; time constant = 0.3 s; center field = 336.000 mT; sweep width = 1.0 mT; and microwave power = 2.5 mW. The  $g$ -factor (dimensionless magnetic moment) was calculated using a  $\text{MgO:Mn}^{2+}$  marker.

**Table S1.** Classification of electro-responsive chiroptical switching (ECSw) behaviors (types I–IV) with comparison to electrochromic behavior and spectral responses in the visible region.

| Type            | Color change <sup>a</sup> | Chiroptical changes <sup>b</sup> |                |                                                                                    | Previous works <sup>1-18</sup> |
|-----------------|---------------------------|----------------------------------|----------------|------------------------------------------------------------------------------------|--------------------------------|
|                 |                           | Sign                             | Intensity      | Spectral response <sup>c</sup>                                                     |                                |
| I               | N <sup>d</sup>            | N                                | Y <sup>e</sup> | 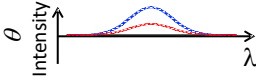 | Ref. 1-9                       |
| II              | N                         | Y                                | Y/N            |  | Ref. 10,11                     |
| III             | Y                         | N                                | Y/N            |  | Ref. 12–16                     |
| IV              | Y                         | Y                                | Y              |  | Ref. 6,17,18                   |
| Electrochromism | Y                         | No signal                        |                |  |                                |

a: Light absorption in the visible region; b: Electronic circular dichroism (CD) or circularly polarized luminescence (CPL) spectroscopy; c: Original (blue) and response (red) CD or CPL spectra in the visible region;  $\lambda$  is wavelength,  $\theta$  is ellipticity. d: No change. e: Change.

## References

1. J.-i. Nishida, T. Suzuki, M. Ohkita and T. Tsuji, *Angew. Chem. Int. Ed.*, 2001, **40**, 3251-3254.
2. Z. Y. Wang, E. K. Todd, X. S. Meng and J. P. Gao, *J. Am. Chem. Soc.*, 2005, **127**, 11552-11553.
3. T. Suzuki, R. Yamamoto, H. Higuchi, E. Hirota, M. Ohkita and T. Tsuji, *J. Chem. Soc., Perkin Trans. 2*, 2002, 1937-1942.
4. H. Higuchi, E. Ohta, H. Kawai, K. Fujiwara, T. Tsuji and T. Suzuki, *J. Org. Chem.*, 2003, **68**, 6605-6610.
5. A. E. Holmes, D. Das and J. W. Canary, *J. Am. Chem. Soc.*, 2007, **129**, 1506-1507.
6. E. Ohta, T. Nehira, H. Kawai, K. Fujiwara and T. Suzuki, *Tetrahedron Lett.*, 2008, **49**, 777-781.
7. J. Deng, N. Song, W. Liu, Q. Zhou and Z. Y. Wang, *Chemphyschem*, 2008, **9**, 1265-1269.
8. T. Suzuki, Y. Ishigaki, T. Iwai, H. Kawai, K. Fujiwara, H. Ikeda, Y. Kano and K. Mizuno, *Chem. Eur. J.*, 2009, **15**, 9434-9441.
9. J. K. Zak, M. Miyasaka, S. Rajca, M. Lapkowski and A. Rajca, *J. Am. Chem. Soc.*, 2010, **132**, 3246-3247.
10. S. Zahn and J. W. Canary, *Science*, 2000, **288**, 1404.
11. S. Zahn, D. Das and J. W. Canary, *Inorg. Chem.*, 2006, **45**, 6056-6063.
12. T. J. Katz, A. Sudhakar, M. F. Teasley, A. M. Gilbert, W. E. Geiger, M. P. Robben, M. Wuensch and M. D. Ward, *J. Am. Chem. Soc.*, 1993, **115**, 3182-3198.
13. E. Anger, M. Srebro, N. Vanthuyne, L. Toupet, S. Rigaut, C. Roussel, J. Autschbach, J. Crassous and R. Réau, *J. Am. Chem. Soc.*, 2012, **134**, 15628-15631.
14. T. Biet, A. Fihey, T. Cauchy, N. Vanthuyne, C. Roussel, J. Crassous and N. Avarvari, *Chem. Eur. J.*, 2013, **19**, 13160-13167.
15. D. Schweinfurth, M. Zalibera, M. Kathan, C. Shen, M. Mazzolini, N. Trapp, J. Crassous, G. Gescheidt and F. Diederich, *J. Am. Chem. Soc.*, 2014, **136**, 13045-13052.
16. M. Srebro, E. Anger, B. Moore Ii, N. Vanthuyne, C. Roussel, R. Réau, J. Autschbach and J. Crassous, *Chem. Eur. J.*, 2015, **21**, 17100-17115.
17. D. Li, Z. Y. Wang and D. Ma, *Chem. Commun.*, 2009, 1529-1531.
18. L. Pospíšil, L. Bednářová, P. Štěpánek, P. Slavíček, J. Vávra, M. Hromadová, H. Dlouhá, J. Tarábek and F. Teplý, *J. Am. Chem. Soc.*, 2014, **136**, 10826-10829.
